# Supplementary material for: A domesticated transposon mediates the effects of a single-nucleotide polymorphism responsible for enhanced muscle growth
Source: PubMed Central journal article supplement — EMBO Rep. 2010 Feb 5;11(4):305–11. doi: 10.1038/embor.2010.6 (PMC2854606; doi:10.1038/embor.2010.6), 2010-02-05
Supplement: embor20106-s1.pdf [file embor20106-s1.pdf]

## **Supplementary Methods for “A domesticated transposon mediates the effects of a SNP responsible for enhanced muscle growth”**

Falk Butter, Dennis Kappei, Frank Buchholz, Michiel Vermeulen and Matthias Mann

### **SILAC cell extract**

C2C12 cells were SILAC-labeled in DMEM (-Arg, -Lys) medium containing 10 % dialyzed fetal bovine serum (Gibco) supplemented with 84 mg/L  $^{13}\text{C}_6^{15}\text{N}_4$  L-arginine and 146 mg/L  $^{13}\text{C}_6^{15}\text{N}_2$  L-lysine (Sigma Isotec or Eurisotop) or the corresponding non-labeled amino acids (Sigma), respectively. Three consecutive batches of cells were independently harvested and nuclear extracts prepared as described (Dignam et al, 1983).

### **MS data acquisition and data analysis**

Peptides were desalted on StageTips (Rappsilber et al, 2003) and analyzed by nanoflow liquid chromatography on an EASY-nLC system from Proxeon Biosystems coupled to a LTQ-Orbitrap XL (Thermo Electron). Peptides were separated on a  $\text{C}_{18}$ -reversed phase column packed with Reprisil and directly mounted on the electrospray ion source on an LTQ-Orbitrap XL. We used a 140 min gradient from 2% to 60% acetonitrile in 0.5% acetic acid at a flow of 200 nl/min. The LTQ-Orbitrap XL was operated with a Top5 MS/MS spectra acquisition method in the linear ion trap per MS full scan in the orbitrap. The raw files were processed with MaxQuant (version 1.0.11.5) and searched with the Mascot search engine (Matrix Science) against an IPI mouse v3.24 protein database concatenated with a decoy of the reversed sequences. Carbamidomethylation was set as fixed modification while methionine oxidation and protein N-acetylation were considered as variable modifications. The search was performed with an initial mass tolerance of 7 ppm mass accuracy for the precursor ion and 0.5 Da for the MS/MS spectra. Search results were processed with MaxQuant with a false discovery rate of 0.01. Prior to statistical

analysis, known contaminants and reverse hits were removed. Only proteins identified with at least two peptides one of them unique were considered for analysis. The protein ratios of the individual experiments were plotted in R (prerelease version 2.8.0).

### **Cloning and recombinant expression of MGR**

The longest ORF in the murine genome containing a start codon (ATG) and a stop codon (TAA) annotated as full-length q3umd3 was subcloned from a BAC (imgenes) into pCR8/Gateway/Topo. The subcloned construct (amino acid exchange at position 575 to histidine) has been completely sequenced. For recombinant expression of a GST fusion protein in E.coli the longest murine ORF was cloned into petM33 (EMBL). E.coli Rosetta culture was induced with 1 mM IPTG and grown overnight at 16 °C . For recombinant expression in HEK 293, cells were transfected with a custom build pcDNA4 Gateway vector having a N-terminal GFP fusion using Lipofectamine 2000 (Invitrogen) according to the manufacturer instructions and harvested with RIPA buffer 24 hours post transfection. Lysates were stored at -80 °C prior to usage.

### **Bisulfite Sequencing**

DNA was prepared using the QIAamp DNA Mini kit (Qiagen) and subsequently treated with bisulfite solution (EZ DNA Methylation kit, Zymo Research). Bisulfite treated DNA was amplified in a single PCR reaction with primers (5'-GGTTTTAAAATTGAGTTAGGGA-3' and 5'-ACTAAATCCTAAAATTCAAAAAAACC-3') using Hot-star Taq (Qiagen). The PCR products were cloned for sequencing into pCR8/Topo vector (Invitrogen) and sequenced in-house.

## **esiRNA synthesis**

The detailed protocol of esiRNA production has been previously published (Kittler et al, 2005). Briefly, optimal region for designing the esiRNA has been chosen using the deqor design algorithm (Henschel et al, 2004) in order to fulfill two criteria: to obtain the most efficient silencing trigger in terms of silencing efficiency, and to get lowest chances to cross-silence other genes. The most favorable fragment was used to design the gene specific primers by the Primer3 algorithm ([http://frodo.wi.mit.edu/cgi-bin/primer3/primer3\\_www.cgi](http://frodo.wi.mit.edu/cgi-bin/primer3/primer3_www.cgi)).

mMGR1 forward: 5'-TCACTATAGGGAGAGAAAGGTGTGCACTCTCATACCA-3',

mMGR1 reverse: 5'-TCACTATAGGGAGACACCTCCACCTCTCCCTTTGT-3',

mMGR2 forward: 5'-TCACTATAGGGAGAGCGCTGCGGTAGCAGTAGTAG-3',

mMGR2 reverse: 5'-TCACTATAGGGAGACTATTTTCAGGGTCCCAGCTC-3',

mMGR3 forward: 5'-TCACTATAGGGAGAGAAGCCAAAAGATCCACCTGA-3',

mMGR3 reverse: 5'-TCACTATAGGGAGACAATGCAGGAAGCATGG-3',

Renilla forward: 5'-GCTAATACGACTCACTATAGGGAGAGGATAACTGGTCCGCAGTGGT-3',

Renilla reverse: 5'-GCTAATACGACTCACTATAGGGAGACCCATTCATCCCATGATTCAA-3'.

Three independent esiRNAs for MGR were designed and synthesized. PCR products for the esiRNA production were sequenced using an Applied Biosystems 3730 Genetic Analyzer (Applied Biosystems) according to the manufacturer's instructions. All positions of sequence trace files were confirmed by manual inspection.

## **Quantitative real-time PCR**

For quantitative real-time PCR, RNA was isolated using the PrepEase RNA Spin kit (USB) according to the manufacturer's instructions. cDNA synthesis was carried out using First strand synthesis kit (Fermentas). Primers (mBeta-2-microglobulin forward: 5'-ATTCACCCCCACTGAGACTG-3', mBeta-2-microglobulin reverse: 5'-TGCTATTTCTTTCTGCGTGC-3', mIGF2 forward:

5'-GCCCTCCTGGAGACATACTG-3', mIGF2 reverse: 5'-GTATCTGGGGAAGTCGTCCG-3') were used at 35 nM concentration together with the IQ SYBR green supermix (Biorad) on a Biorad CFX96 RT-PCR machine. Target gene mRNA levels were normalized against quantification of GAPDH mRNA levels for housekeeping using the  $\Delta\Delta\text{Act}$  method (Nolan et al, 2006).

## References

Dignam JD, Lebovitz RM, Roeder RG (1983) Accurate transcription initiation by RNA polymerase II in a soluble extract from isolated mammalian nuclei. *Nucleic acids research* **11**: 1475-1489

Henschel A, Buchholz F, Habermann B (2004) DEQOR: a web-based tool for the design and quality control of siRNAs. *Nucleic acids research* **32**: W113-120

Kittler R, Heninger AK, Franke K, Habermann B, Buchholz F (2005) Production of endoribonuclease-prepared short interfering RNAs for gene silencing in mammalian cells. *Nature methods* **2**: 779-784

Nolan T, Hands RE, Bustin SA (2006) Quantification of mRNA using real-time RT-PCR. *Nature protocols* **1**: 1559-1582

Rappsilber J, Ishihama Y, Mann M (2003) Stop and go extraction tips for matrix-assisted laser desorption/ionization, nanoelectrospray, and LC/MS sample pretreatment in proteomics. *Anal Chem* **75**: 663-670

| Sequence                           | Uniprot              | Type       | Experiment | Charge | m/z      | Mass     | Mass Error [ppm] | FPR      | Mascot Score | Ratio H/L Normalized | Ratio H/L Significance(B) |
|------------------------------------|----------------------|------------|------------|--------|----------|----------|------------------|----------|--------------|----------------------|---------------------------|
| AVPQLYDSVR                         | Q3UMD3;Q8C1U4;Q8CBM9 | ISO-MSMS   | for_1      | 2      | 574.3089 | 1146.603 | 0.35785          | 0.36581  | 34.36        | 4.2016               | 0.0072646                 |
| AVPQLYDSVR                         | Q3UMD3;Q8C1U4;Q8CBM9 | SILAC-MSMS | for_1      | 2      | 574.3089 | 1146.603 | -1.9079          | 0.001205 | 61.36        | 6.1686               | 0.006245                  |
| AVPQLYDSVR                         | Q3UMD3;Q8C1U4;Q8CBM9 | SILAC-MSMS | for_1      | 2      | 574.3089 | 1146.603 | -0.18392         | 0.188    | 32.72        | 4.6903               | 8.22E-06                  |
| DLGSGRPVADAPASLASGAPEQDEESLFEGNIEK | Q3UMD3;Q8C1U4;Q8CBM9 | SILAC-MSMS | for_1      | 3      | 1152.885 | 3455.633 | 2.0507           | 4.81E-30 | 63.61        | 2.4877               | 0.071755                  |
| FLQIVAPDYR                         | Q3UMD3;Q8C1U4;Q8CBM9 | SILAC-MSMS | for_1      | 2      | 611.335  | 1220.655 | 1.8881           | 0.005397 | 43.94        | 5.2084               | 0.019334                  |
| FLQIVAPDYR                         | Q3UMD3;Q8C1U4;Q8CBM9 | SILAC-MSMS | for_1      | 2      | 611.335  | 1220.655 | -0.69915         | 0.001649 | 44.33        | 7.0028               | 1.55E-08                  |
| FLQIVAPDYR                         | Q3UMD3;Q8C1U4;Q8CBM9 | ISO-MSMS   | for_1      | 2      | 611.335  | 1220.655 | 4.3928           | 0.006667 | 23.12        | 2.6567               | 0.017553                  |
| FLQIVAPDYR                         | Q3UMD3;Q8C1U4;Q8CBM9 | ISO-MSMS   | for_1      | 2      | 611.335  | 1220.655 | 4.261            | 0.017936 | 17.56        | 0.043893             | 2.13E-08                  |
| FLQIVAPDYR                         | Q3UMD3;Q8C1U4;Q8CBM9 | ISO-MSMS   | for_1      | 2      | 611.335  | 1220.655 | 0.9662           | 0.056325 | 29.34        | 1.7747               | 0.14924                   |
| GITQALNLVDSLK                      | Q3UMD3;Q8C1U4;Q8CBM9 | SILAC-MSMS | for_1      | 2      | 786.4538 | 1570.893 | 0.69757          | 1.68E-23 | 86.39        | 6.0694               | 0.011586                  |
| GITQALNLVDSLK                      | Q3UMD3;Q8C1U4;Q8CBM9 | SILAC-MSMS | for_1      | 3      | 524.6383 | 1570.893 | 1.5789           | 6.53E-23 | 52.47        | 4.6622               | 0.0005173                 |
| GITQALNLVDSLK                      | Q3UMD3;Q8C1U4;Q8CBM9 | ISO-MSMS   | for_1      | 2      | 786.4538 | 1570.893 | 1.3563           | 1.24E-25 | 67.04        | 5.5371               | 1.06E-06                  |
| GITQALNLVDSLK                      | Q3UMD3;Q8C1U4;Q8CBM9 | ISO-MSMS   | for_1      | 2      | 786.4538 | 1570.893 | 0.10445          | 7.24E-11 | 49.01        | 5.7429               | 6.40E-07                  |
| HLQATHPIHWAVANK                    | Q3UMD3;Q8C1U4;Q8CBM9 | SILAC-MSMS | for_1      | 4      | 431.4851 | 1721.911 | -0.42437         | 0.077714 | 15.47        | 6.4494               | 0.0054362                 |
| HLQATHPIHWAVANK                    | Q3UMD3;Q8C1U4;Q8CBM9 | SILAC-MSMS | for_1      | 4      | 431.4851 | 1721.911 | 0.079536         | 0.010027 | 36.02        | 4.4924               | 6.46E-06                  |
| IFLTLENVQSQK                       | Q3UMD3;Q8C1U4;Q8CBM9 | SILAC-MSMS | for_1      | 2      | 710.3957 | 1418.777 | 0.88073          | 2.63E-10 | 52.17        | 6.567                | 0.0087722                 |
| IFLTLENVQSQK                       | Q3UMD3;Q8C1U4;Q8CBM9 | SILAC-MSMS | for_1      | 2      | 710.3957 | 1418.777 | 0.57167          | 4.57E-10 | 49.71        | 5.3679               | 1.40E-06                  |
| LES DALLSAMLK                      | Q3UMD3;Q8C1U4;Q8CBM9 | ISO-MSMS   | for_1      | 2      | 645.8523 | 1289.69  | 3.6272           | 3.03E-21 | 54.12        | 6.3587               | 0.0095725                 |
| LES DALLSAMLK                      | Q3UMD3;Q8C1U4;Q8CBM9 | SILAC-MSMS | for_1      | 2      | 645.8523 | 1289.69  | 1.0617           | 1.26E-11 | 71.39        | 5.3177               | 7.94E-05                  |
| LES DALLSAMLK(ox)LK                | Q3UMD3;Q8C1U4;Q8CBM9 | ISO-MSMS   | for_1      | 2      | 653.8498 | 1305.685 | -0.1435          | 1.76E-12 | 51.96        | 4.0219               | 0.00024808                |
| LGTDSTFSIK                         | Q3UMD3;Q8C1U4;Q8CBM9 | ISO-MSMS   | for_1      | 2      | 534.7822 | 1067.55  | -0.070599        | 0.58428  | 10.21        | 3.9112               | 0.010145                  |
| LGTDSTFSIK                         | Q3UMD3;Q8C1U4;Q8CBM9 | SILAC-MSMS | for_1      | 2      | 534.7822 | 1067.55  | -1.1119          | 0.001649 | 49.63        | 4.9841               | 0.014435                  |
| LGTDSTFSIK                         | Q3UMD3;Q8C1U4;Q8CBM9 | SILAC-MSMS | for_1      | 2      | 534.7822 | 1067.55  | -2.7133          | 0.001649 | 45.88        | 4.5914               | 1.53E-05                  |
| LPSETYFFTK                         | Q3UMD3;Q8C1U4;Q8CBM9 | SILAC-MSMS | for_1      | 2      | 616.8135 | 1231.613 | 0.92397          | 0.005397 | 26.04        | 5.3301               | 0.011439                  |
| LPSETYFFTK                         | Q3UMD3;Q8C1U4;Q8CBM9 | SILAC-MSMS | for_1      | 2      | 616.8135 | 1231.613 | -0.39655         | 0.009076 | 41.12        | 4.5706               | 1.14E-05                  |
| NSLEDFFPQGDLETYK                   | Q3UMD3;Q8C1U4;Q8CBM9 | ISO-MSMS   | for_1      | 2      | 987.46   | 1972.905 | 0.32136          | 7.44E-14 | 46.76        | 5.8058               | 0.0013689                 |
| NSLEDFFPQGDLETYK                   | Q3UMD3;Q8C1U4;Q8CBM9 | SILAC-MSMS | for_1      | 2      | 987.46   | 1972.905 | 0.88107          | 5.25E-24 | 44.91        | 7.4535               | 9.13E-08                  |
| PVADAPASLASGAPEQDEESLFEGNIEK       | Q3UMD3;Q8C1U4;Q8CBM9 | ISO-MSMS   | for_1      | 3      | 957.7892 | 2870.346 | 1.1489           | 0.12713  | 10.69        | 2.574                | 0.067433                  |
| PVADAPASLASGAPEQDEESLFEGNIEK       | Q3UMD3;Q8C1U4;Q8CBM9 | ISO-MSMS   | for_1      | 3      | 957.7892 | 2870.346 | 0.026645         | 1.07E-06 | 39           | 3.0442               | 0.0065844                 |
| PVADAPASLASGAPEQDEESLFEGNIEK       | Q3UMD3;Q8C1U4;Q8CBM9 | ISO-MSMS   | for_1      | 3      | 957.7892 | 2870.346 | 3.8164           | 0.036991 | 7.68         | 4.0316               | 0.0006371                 |
| QDETGHWISTFYMLK                    | Q3UMD3;Q8C1U4;Q8CBM9 | SILAC-MSMS | for_1      | 3      | 619.2943 | 1854.861 | 1.6311           | 0.005265 | 22.61        | 6.0391               | 9.49E-07                  |
| QILQEFQNDHQLPWK                    | Q3UMD3;Q8C1U4;Q8CBM9 | SILAC-MSMS | for_1      | 3      | 641.9952 | 1922.964 | 1.8546           | 0.087227 | 12.68        | 4.5241               | 0.036648                  |
| QILQEFQNDHQLPWK                    | Q3UMD3;Q8C1U4;Q8CBM9 | SILAC-MSMS | for_1      | 3      | 641.9952 | 1922.964 | 1.1006           | 0.00053  | 30.81        | 4.8267               | 3.56E-06                  |
| SIENMLVAAR                         | Q3UMD3;Q8C1U4;Q8CBM9 | SILAC-MSMS | for_1      | 2      | 552.2975 | 1102.581 | -1.5583          | 9.49E-06 | 44.25        | 5.1136               | 0.02313                   |
| SIENMLVAAR                         | Q3UMD3;Q8C1U4;Q8CBM9 | SILAC-MSMS | for_1      | 2      | 552.2975 | 1102.581 | 0.32601          | 9.49E-06 | 34.33        | 4.8669               | 3.19E-06                  |
| SSLLPAAVAVVDEYFK                   | Q3UMD3;Q8C1U4;Q8CBM9 | SILAC-MSMS | for_1      | 3      | 570.3101 | 1707.908 | 0.94069          | 3.60E-30 | 59.28        | 6.215                | 0.014161                  |
| SSLLPAAVAVVDEYFK                   | Q3UMD3;Q8C1U4;Q8CBM9 | SILAC-MSMS | for_1      | 3      | 570.3101 | 1707.908 | 0.024406         | 3.60E-30 | 54.64        | 4.4758               | 1.63E-06                  |
| SSLLPAAVAVVDEYFK                   | Q3UMD3;Q8C1U4;Q8CBM9 | ISO-MSMS   | for_1      | 2      | 854.9615 | 1707.908 | 1.3352           | 2.10E-58 | 100.16       | 6.8287               | 2.77E-11                  |
| SSLLPAAVAVVDEYFK                   | Q3UMD3;Q8C1U4;Q8CBM9 | SILAC-MSMS | for_1      | 3      | 570.3101 | 1707.908 | -1.3578          | 1.19E-14 | 57.44        | 6.2043               | 0.00087459                |
| TSAVVWFFYTDPPQHISR                 | Q3UMD3;Q8C1U4;Q8CBM9 | SILAC-MSMS | for_1      | 3      | 690.334  | 2067.98  | 1.8657           | 2.49E-21 | 26.39        | 3.8579               | 0.055411                  |
| TSAVVWFFYTDPPQHISR                 | Q3UMD3;Q8C1U4;Q8CBM9 | SILAC-MSMS | for_1      | 3      | 690.334  | 2067.98  | -1.2407          | 2.35E-24 | 66.06        | 5.1242               | 1.85E-05                  |
| TSIVWHFFHVPDQYTWR                  | Q3UMD3;Q8C1U4;Q8CBM9 | ISO-MSMS   | for_1      | 4      | 555.526  | 2218.075 | 0.1268           | 0.53605  | 21.81        | 2.5683               | 0.047191                  |
| YELSGGDDPLVYWQR                    | Q3UMD3;Q8C1U4;Q8CBM9 | ISO-MSMS   | for_1      | 2      | 942.9418 | 1883.869 | 2.8391           | 2.31E-24 | 60.53        | 4.6173               | 0.020407                  |
| YELSGGDDPLVYWQR                    | Q3UMD3;Q8C1U4;Q8CBM9 | SILAC-MSMS | for_1      | 3      | 628.9636 | 1883.869 | 2.2637           | 3.17E-05 | 27.29        | 5.2866               | 2.06E-05                  |
| YELSGGDDPLVYWQR                    | Q3UMD3;Q8C1U4;Q8CBM9 | ISO-MSMS   | for_1      | 2      | 942.9418 | 1883.869 | 1.1238           | 1.52E-18 | 60.14        | 6.8826               | 7.95E-11                  |
| AVPQLYDSVR                         | Q3UMD3;Q8C1U4;Q8CBM9 | ISO-MSMS   | for_2      | 2      | 574.3089 | 1146.603 | -0.80552         | 0.36581  | 20.36        | 6.5376               | 3.65E-21                  |
| AVPQLYDSVR                         | Q3UMD3;Q8C1U4;Q8CBM9 | MSMS       | for_2      | 2      | 574.3089 | 1146.603 | 0.46834          | 0.52927  | 14.13        |                      |                           |
| DLGSGRPVADAPASLASGAPEQDEESLFEGNIEK | Q3UMD3;Q8C1U4;Q8CBM9 | ISO-MSMS   | for_2      | 3      | 1152.885 | 3455.633 | -0.20812         | 0.77308  | 6.18         | 3.3512               | 2.44E-08                  |
| FLQIVAPDYR                         | Q3UMD3;Q8C1U4;Q8CBM9 | ISO-MSMS   | for_2      | 2      | 611.335  | 1220.655 | -0.060021        | 0.002458 | 40.53        | 7.5686               | 2.76E-24                  |
| FLQIVAPDYR                         | Q3UMD3;Q8C1U4;Q8CBM9 | ISO-MSMS   | for_2      | 2      | 611.335  | 1220.655 | -0.49491         | 0.006667 | 48.02        | 5.9134               | 3.71E-19                  |
| FLQIVAPDYR                         | Q3UMD3;Q8C1U4;Q8CBM9 | ISO-MSMS   | for_2      | 2      | 611.335  | 1220.655 | 0.66017          | 0.056325 | 21.55        |                      |                           |
| GITQALNLVDSLK                      | Q3UMD3;Q8C1U4;Q8CBM9 | SILAC-MSMS | for_2      | 2      | 786.4538 | 1570.893 | 2.3563           | 8.68E-16 | 49.88        | 7.8949               | 3.54E-25                  |
| GITQALNLVDSLK                      | Q3UMD3;Q8C1U4;Q8CBM9 | ISO-MSMS   | for_2      | 3      | 524.6383 | 1570.893 | 0.66734          | 2.58E-08 | 43.95        | 10.245               | 4.45E-26                  |
| GITQALNLVDSLK                      | Q3UMD3;Q8C1U4;Q8CBM9 | ISO-MSMS   | for_2      | 2      | 786.4538 | 1570.893 | 2.3174           | 1.72E-05 | 45.2         |                      |                           |
| GITQALNLVDSLK                      | Q3UMD3;Q8C1U4;Q8CBM9 | MSMS       | for_2      | 3      | 524.6383 | 1570.893 | 2.066            | 0.000159 | 62.34        |                      |                           |
| GRPGSHLGTSLQR                      | Q3UMD3;Q8C1U4;Q8CBM9 | ISO-MSMS   | for_2      | 3      | 489.5989 | 1465.775 | -2.5149          | 0.001796 | 38.28        | 6.1214               | 9.07E-14                  |
| GRPGSHLGTSLQR                      | Q3UMD3;Q8C1U4;Q8CBM9 | MSMS       | for_2      | 3      | 489.5989 | 1465.775 | 2.1784           | 0.000769 | 29.92        |                      |                           |
| GRPGSHLGTSLQR                      | Q3UMD3;Q8C1U4;Q8CBM9 | ISO-MSMS   | for_2      | 3      | 489.5989 | 1465.775 | -1.6051          | 0.001796 | 40.31        |                      |                           |
| HCILATLLDPCFK                      | Q3UMD3;Q8C1U4;Q8CBM9 | MSMS       | for_2      | 3      | 529.9389 | 1586.795 | 1.4886           | 0.57841  | 5.17         |                      |                           |
| HLQATHPIHWAVANK                    | Q3UMD3;Q8C1U4;Q8CBM9 | ISO-MSMS   | for_2      | 4      | 431.4851 | 1721.911 | -1.6623          | 0.15823  | 27.4         |                      |                           |
| HLQATHPIHWAVANK                    | Q3UMD3;Q8C1U4;Q8CBM9 | ISO-MSMS   | for_2      | 4      | 431.4851 | 1721.911 | -1.3952          | 0.002712 | 36.83        |                      |                           |
| IFLTLENVQSQK                       | Q3UMD3;Q8C1U4;Q8CBM9 | SILAC-MSMS | for_2      | 2      | 710.3957 | 1418.777 | 0.20281          | 6.26E-05 | 45.74        | 6.1521               | 8.63E-16                  |
| IFLTLENVQSQK                       | Q3UMD3;Q8C1U4;Q8CBM9 | ISO-MSMS   | for_2      | 2      | 710.3957 | 1418.777 | 0.037826         | 0.000138 | 41.94        |                      |                           |

|                                    |                      |            |       |   |          |          |          |          |       |          |            |
|------------------------------------|----------------------|------------|-------|---|----------|----------|----------|----------|-------|----------|------------|
| LES DALLSAMLK                      | Q3UMD3;Q8C1U4;Q8CBM9 | ISO-MSMS   | for_2 | 2 | 645.8523 | 1289.69  | 2.2083   | 2.60E-05 | 60.32 |          |            |
| LES DALLSAMLK                      | Q3UMD3;Q8C1U4;Q8CBM9 | MSMS       | for_2 | 2 | 645.8523 | 1289.69  | 1.3162   | 0.002787 | 38.41 |          |            |
| LES DALLSAM(ox)LK                  | Q3UMD3;Q8C1U4;Q8CBM9 | ISO-MSMS   | for_2 | 2 | 653.8498 | 1305.685 | 0.33887  | 0.001385 | 54.5  |          |            |
| LGTDSFTSIK                         | Q3UMD3;Q8C1U4;Q8CBM9 | ISO-MSMS   | for_2 | 2 | 534.7822 | 1067.55  | 0.35919  | 0.36581  | 26.07 | 7.6835   | 1.28E-24   |
| LGTDSFTSIK                         | Q3UMD3;Q8C1U4;Q8CBM9 | ISO-MSMS   | for_2 | 2 | 534.7822 | 1067.55  | 0.63007  | 0.36581  | 20.96 |          |            |
| LPSETYFFTK                         | Q3UMD3;Q8C1U4;Q8CBM9 | ISO-MSMS   | for_2 | 2 | 616.8135 | 1231.613 | -1.1772  | 0.17514  | 42.66 | 5.6582   | 2.67E-15   |
| NSLEDFFPQGDLETYK                   | Q3UMD3;Q8C1U4;Q8CBM9 | ISO-MSMS   | for_2 | 2 | 987.46   | 1972.905 | 1.1969   | 7.44E-14 | 47.95 |          |            |
| PVADAPASLASGAPEQDEESLFEGNIEK       | Q3UMD3;Q8C1U4;Q8CBM9 | ISO-MSMS   | for_2 | 3 | 957.7892 | 2870.346 | -1.1442  | 1.57E-08 | 33.74 |          |            |
| QILQEFQNDHQPLPWK                   | Q3UMD3;Q8C1U4;Q8CBM9 | ISO-MSMS   | for_2 | 3 | 641.9952 | 1922.964 | 0.79801  | 0.33779  | 12.38 |          |            |
| SIENM(ox)LVAAR                     | Q3UMD3;Q8C1U4;Q8CBM9 | MSMS       | for_2 | 2 | 560.295  | 1118.575 | -0.38721 | 0.020584 | 27.11 |          |            |
| SIENM(ox)LVAAR                     | Q3UMD3;Q8C1U4;Q8CBM9 | MSMS       | for_2 | 2 | 560.295  | 1118.575 | -16.113  | 0.020584 | 41.31 |          |            |
| SIENM(ox)LVAAR                     | Q3UMD3;Q8C1U4;Q8CBM9 | MSMS       | for_2 | 2 | 560.295  | 1118.575 | -1.1492  | 0.060799 | 41.31 |          |            |
| SSLLPAAVAVVDEYFK                   | Q3UMD3;Q8C1U4;Q8CBM9 | ISO-MSMS   | for_2 | 2 | 854.9615 | 1707.908 | 4.2817   | 5.06E-42 | 54.74 | 10.582   | 2.72E-32   |
| SSLLPAAVAVVDEYFK                   | Q3UMD3;Q8C1U4;Q8CBM9 | ISO-MSMS   | for_2 | 3 | 570.3101 | 1707.908 | 2.3218   | 0.000181 | 38.91 |          |            |
| TSAVWNFFYTDPOHISR                  | Q3UMD3;Q8C1U4;Q8CBM9 | ISO-MSMS   | for_2 | 3 | 690.334  | 2067.98  | 1.4076   | 1.59E-11 | 27.94 | 4.3035   | 2.29E-11   |
| TSAVWNFFYTDPOHISR                  | Q3UMD3;Q8C1U4;Q8CBM9 | MSMS       | for_2 | 3 | 690.334  | 2067.98  | 1.025    | 0.004271 | 29.53 |          |            |
| WAVLCVTGLAK                        | Q3UMD3;Q8C1U4;Q8CBM9 | ISO-MSMS   | for_2 | 2 | 609.3392 | 1216.664 | 0.40826  | 0.005469 | 27.48 |          |            |
| WAVLCVTGLAK                        | Q3UMD3;Q8C1U4;Q8CBM9 | MSMS       | for_2 | 2 | 609.3392 | 1216.664 | -0.52749 | 0.004115 | 35.44 |          |            |
| YSELGGDDPLVYWQR                    | Q3UMD3;Q8C1U4;Q8CBM9 | ISO-MSMS   | for_2 | 2 | 942.9418 | 1883.869 | 0.53666  | 1.10E-08 | 46.23 | 3.1857   | 1.25E-06   |
| AVPQLYDSVR                         | Q3UMD3;Q8C1U4;Q8CBM9 | MSMS       | rev_2 | 2 | 574.3089 | 1146.603 | -0.48417 | 0.14626  | 20.11 |          |            |
| DLGSGRPVADAPASLASGAPEQDEESLFEGNIEK | Q3UMD3;Q8C1U4;Q8CBM9 | ISO-MSMS   | rev_2 | 3 | 1152.885 | 3455.633 | 1.343    | 3.26E-17 | 50.84 | 0.070399 | 7.11E-19   |
| DLGSGRPVADAPASLASGAPEQDEESLFEGNIEK | Q3UMD3;Q8C1U4;Q8CBM9 | SILAC-MSMS | rev_2 | 3 | 1152.885 | 3455.633 | -0.83156 | 6.13E-12 | 45.98 | 0.29292  | 0.00067091 |
| FLQIVAPDYR                         | Q3UMD3;Q8C1U4;Q8CBM9 | SILAC-MSMS | rev_2 | 2 | 611.335  | 1220.655 | 0.81139  | 0.001649 | 48.31 | 0.12997  | 4.14E-15   |
| FLQIVAPDYR                         | Q3UMD3;Q8C1U4;Q8CBM9 | ISO-MSMS   | rev_2 | 2 | 611.335  | 1220.655 | 0.45202  | 0.002458 | 35.27 | 0.12034  | 7.92E-08   |
| GITQALNLVDSLSLK                    | Q3UMD3;Q8C1U4;Q8CBM9 | ISO-MSMS   | rev_2 | 2 | 786.4538 | 1570.893 | 2.8205   | 1.48E-18 | 68.83 |          |            |
| GRPGSHLGTSTLQR                     | Q3UMD3;Q8C1U4;Q8CBM9 | ISO-MSMS   | rev_2 | 3 | 489.5989 | 1465.775 | -1.502   | 0.008842 | 22.62 | 0.096558 | 4.65E-15   |
| GRPGSHLGTSTLQR                     | Q3UMD3;Q8C1U4;Q8CBM9 | ISO-MSMS   | rev_2 | 4 | 367.451  | 1465.775 | -1.7203  | 0.95989  | 18.7  |          |            |
| GRPGSHLGTSTLQR                     | Q3UMD3;Q8C1U4;Q8CBM9 | ISO-MSMS   | rev_2 | 2 | 733.8948 | 1465.775 | -2.5704  | 0.000411 | 25.59 |          |            |
| GRPGSHLGTSTLQR                     | Q3UMD3;Q8C1U4;Q8CBM9 | MSMS       | rev_2 | 3 | 489.5989 | 1465.775 | -2.1335  | 0.036662 | 30.53 |          |            |
| GRPGSHLGTSTLQR                     | Q3UMD3;Q8C1U4;Q8CBM9 | ISO-MSMS   | rev_2 | 3 | 489.5989 | 1465.775 | -1.9196  | 0.001796 | 32.76 |          |            |
| HCILATLLDPCFK                      | Q3UMD3;Q8C1U4;Q8CBM9 | ISO-MSMS   | rev_2 | 3 | 529.9389 | 1586.795 | 1.0246   | 0.52666  | 18.48 | 0.12455  | 8.37E-11   |
| HCILATLLDPCFK                      | Q3UMD3;Q8C1U4;Q8CBM9 | ISO-MSMS   | rev_2 | 2 | 794.4047 | 1586.795 | 1.8526   | 5.62E-11 | 40.56 |          |            |
| HCILATLLDPCFK                      | Q3UMD3;Q8C1U4;Q8CBM9 | MSMS       | rev_2 | 3 | 529.9389 | 1586.795 | 0.60258  | 0.5132   | 19.48 |          |            |
| IFLTLENVQSQK                       | Q3UMD3;Q8C1U4;Q8CBM9 | SILAC-MSMS | rev_2 | 2 | 710.3957 | 1418.777 | 1.4409   | 6.26E-05 | 47.42 | 0.068478 | 7.00E-33   |
| IFLTLENVQSQK                       | Q3UMD3;Q8C1U4;Q8CBM9 | ISO-MSMS   | rev_2 | 2 | 710.3957 | 1418.777 | 0.57942  | 2.60E-05 | 56.93 | 0.024367 | 3.27E-22   |
| LES DALLSAMLK                      | Q3UMD3;Q8C1U4;Q8CBM9 | MSMS       | rev_2 | 2 | 645.8523 | 1289.69  | 15.63    | 0.001602 | 21.2  |          |            |
| LES DALLSAMLK                      | Q3UMD3;Q8C1U4;Q8CBM9 | ISO-MSMS   | rev_2 | 2 | 645.8523 | 1289.69  | 1.0667   | 9.14E-08 | 62.64 |          |            |
| LES DALLSAM(ox)LK                  | Q3UMD3;Q8C1U4;Q8CBM9 | ISO-MSMS   | rev_2 | 2 | 653.8498 | 1305.685 | 0.27971  | 0.000138 | 47.83 | 0.18135  | 8.19E-08   |
| LES DALLSAM(ox)LK                  | Q3UMD3;Q8C1U4;Q8CBM9 | ISO-MSMS   | rev_2 | 2 | 653.8498 | 1305.685 | -0.28743 | 9.14E-08 | 45.86 |          |            |
| LGTDSFTSIK                         | Q3UMD3;Q8C1U4;Q8CBM9 | SILAC-MSMS | rev_2 | 2 | 534.7822 | 1067.55  | -0.4219  | 0.43401  | 18.24 | 0.10972  | 4.37E-24   |
| QILQEFQNDHQPLPWK                   | Q3UMD3;Q8C1U4;Q8CBM9 | SILAC-MSMS | rev_2 | 3 | 641.9952 | 1922.964 | 1.1543   | 0.032302 | 15.73 | 0.06646  | 6.08E-17   |
| QILQEFQNDHQPLPWK                   | Q3UMD3;Q8C1U4;Q8CBM9 | ISO-MSMS   | rev_2 | 2 | 962.4892 | 1922.964 | 0.80071  | 0.10932  | 19.61 |          |            |
| QILQEFQNDHQPLPWK                   | Q3UMD3;Q8C1U4;Q8CBM9 | ISO-MSMS   | rev_2 | 3 | 641.9952 | 1922.964 | 1.3365   | 0.003667 | 17.18 |          |            |
| SIENMLVAAR                         | Q3UMD3;Q8C1U4;Q8CBM9 | ISO-MSMS   | rev_2 | 2 | 552.2975 | 1102.581 | -0.15857 | 0.17514  | 9.8   | 0.23106  | 3.51E-06   |
| SIENM(ox)LVAAR                     | Q3UMD3;Q8C1U4;Q8CBM9 | ISO-MSMS   | rev_2 | 2 | 560.295  | 1118.575 | 0.24216  | 0.006667 | 52.38 | 0.21912  | 1.61E-06   |
| SIENM(ox)LVAAR                     | Q3UMD3;Q8C1U4;Q8CBM9 | MSMS       | rev_2 | 2 | 560.295  | 1118.575 | -0.80012 | 0.004898 | 45.86 |          |            |
| SIENM(ox)LVAAR                     | Q3UMD3;Q8C1U4;Q8CBM9 | MSMS       | rev_2 | 2 | 560.295  | 1118.575 | -8.864   | 0.14626  | 22.76 |          |            |
| SIENM(ox)LVAAR                     | Q3UMD3;Q8C1U4;Q8CBM9 | ISO-MSMS   | rev_2 | 2 | 560.295  | 1118.575 | 1.1669   | 0.006667 | 39.57 |          |            |
| SIENM(ox)LVAAR                     | Q3UMD3;Q8C1U4;Q8CBM9 | ISO-MSMS   | rev_2 | 2 | 560.295  | 1118.575 | 0.63407  | 0.002458 | 46.49 |          |            |
| SSLLPAAVAVVDEYFK                   | Q3UMD3;Q8C1U4;Q8CBM9 | ISO-MSMS   | rev_2 | 3 | 570.3101 | 1707.908 | 3.7702   | 1.23E-31 | 58.13 |          |            |
| TSAVWNFFYTDPOHISR                  | Q3UMD3;Q8C1U4;Q8CBM9 | ISO-MSMS   | rev_2 | 3 | 690.334  | 2067.98  | 1.3879   | 0.000879 | 13.59 | 0.083771 | 1.42E-14   |
